# Supplementary material for: Proteomic and metabolomic profiles of larval hemolymph associated with diapause in the cotton bollworm, Helicoverpa armigera
Source: PubMed Central journal article supplement (PMC4046812; doi:10.1186/1471-2164-14-751), 2013-11-01

Additional file 1: Figure S1

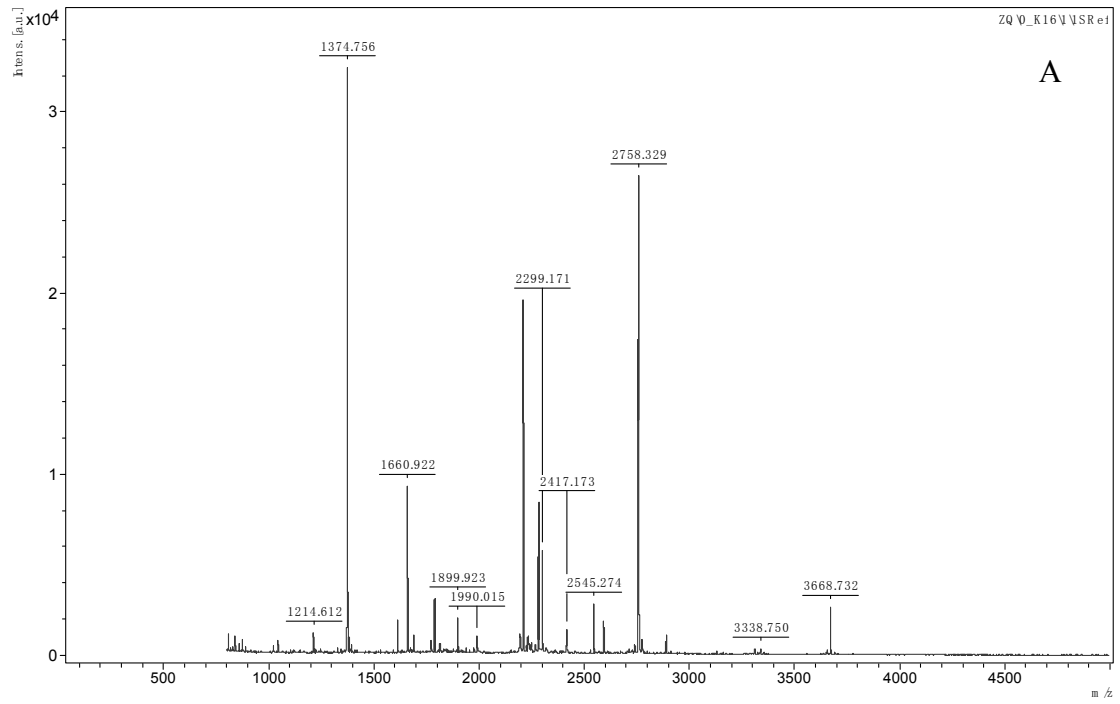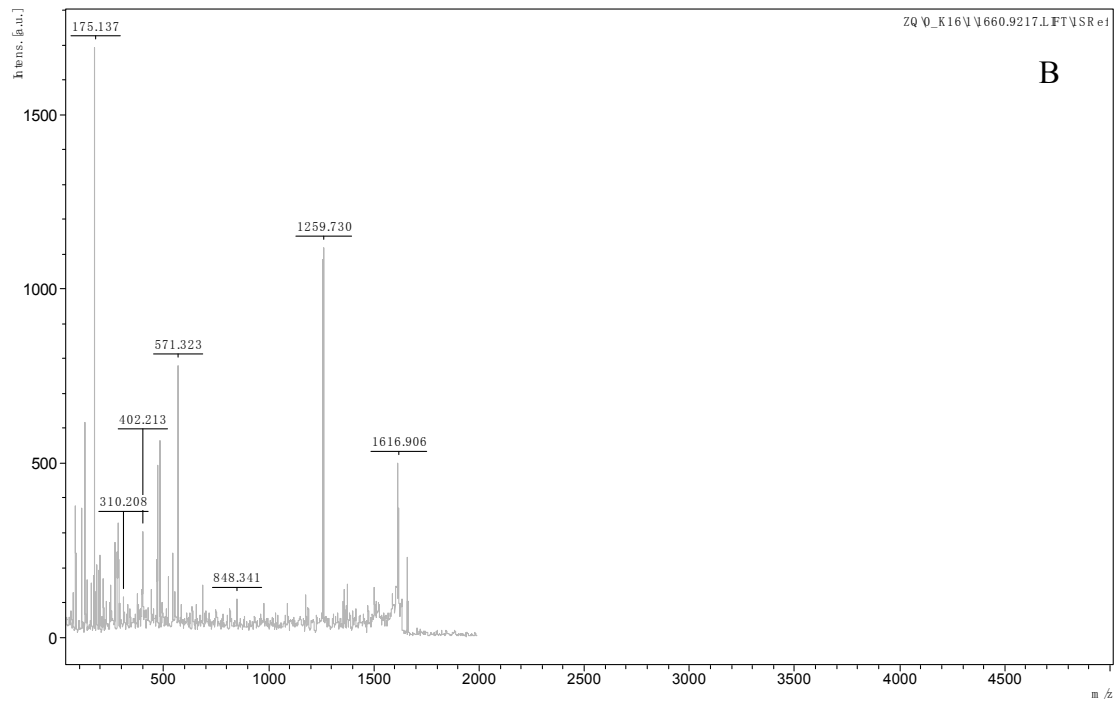

Supplement: 12864_2013_5472_MOESM1_ESM.pdf [file 12864_2013_5472_MOESM1_ESM.pdf]
